# Supplementary material for: Nano molar detection of Al3+in aqueous medium and acidic soil using chromone based fluorescent organic nanoparticles (FONPs)
Source: Royal Society of Chemistry journal article supplement (doi:10.1039/c4ay01772b), 2014-09-01
Supplement: c4ay01772b1.pdf [file c4ay01772b1.pdf]

## Supporting Information

### **Nano Molar Detection of Al<sup>3+</sup> in Aqueous Medium and Acidic Soil using Chromone based Fluorescent Organic Nanoparticles (FONPs)**

Amanpreet Kaur<sup>a</sup>, Tilak Raj<sup>b</sup>, Simanpreet Kaur,<sup>a</sup> and Navneet Kaur<sup>a,\*</sup>

<sup>a</sup>Centre for Nanoscience and Nanotechnology (UIEAST), Panjab University, Chandigarh, India, 160014

<sup>b</sup>Department of Chemistry, Indian Institute of Technology Ropar (IIT Ropar), Punjab, India, 140001

\*Corresponding Author: navneetkaur@pu.ac.in

#### Table of contents

**Scheme S1:** Syntheses of compounds **1-2**

**Figure S1:** <sup>1</sup>H NMR of compound **2**

**Figure S2:** <sup>13</sup>C NMR of Compound **2**

**Figure S3:** Mass Spectra of Compound **2**

**Figure S4:** (A) Changes in the UV-Vis absorption profile of nano-aggregates of **1** at different concentrations (4 to 16 μM); (B) Changes in the UV-Vis abs profile of nano-aggregates of **2** at different concentrations (5 to 20 μM).

**Figure S5:** (A) Changes in the emission profile of nano-aggregates of **1** at different concentrations (0.5 to 3.5 μM); (B) Changes in the emission profile of nano-aggregates of **2** at different concentrations (0.5 to 5 μM).

**Figure S6.** Changes in fluorescence intensity of receptor **2** (2.5 μM) upon addition of a various metal salts (5eq.) in aqueous medium (λ<sub>ex</sub> = 345 nm).

**Figure S7:** Effect of pH on the Fluorescence intensity of a receptor **1** and **1**.Al<sup>3+</sup>

**Figure S8.** Effect of ionic strength on Fluorescence intensity of receptor **1** at λ<sub>ex</sub> = 321 nm with the addition of 150 eq. of Tetrabutyl ammonium perchlorate.

**Figure S9.** Job's plot between sensor **1** and  $\text{Al}^{3+}$ . The concentration of [HG] was calculated by the equation  $[\text{HG}] = \Delta I/I_0 \times [\text{H}]$ .

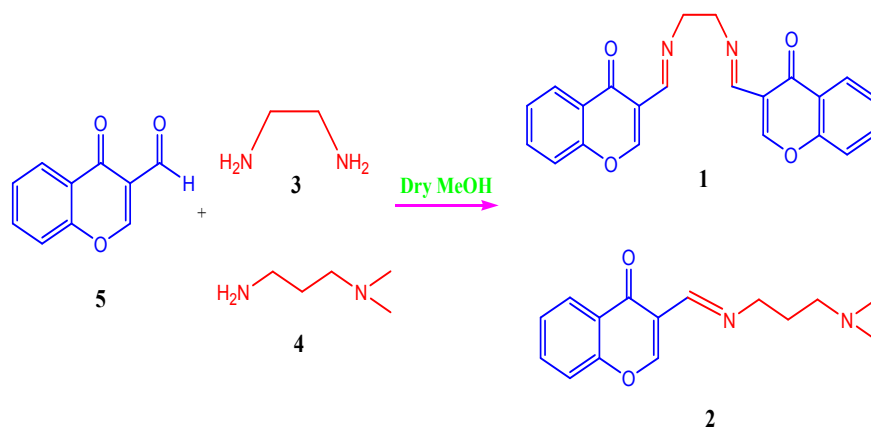

**Scheme S1:** Syntheses of compounds **1-2**.

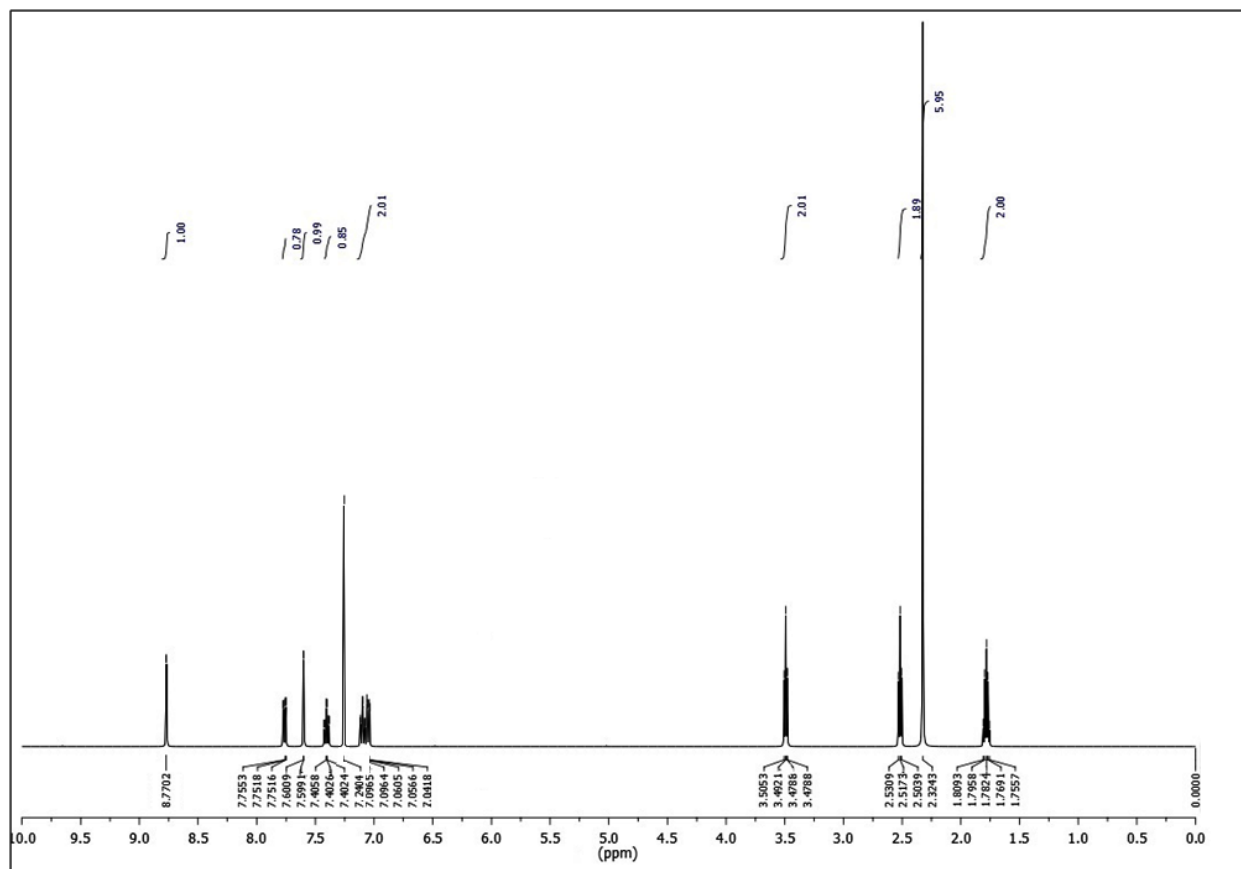

**Figure S1:**  $^1\text{H}$  NMR of compound **2**.

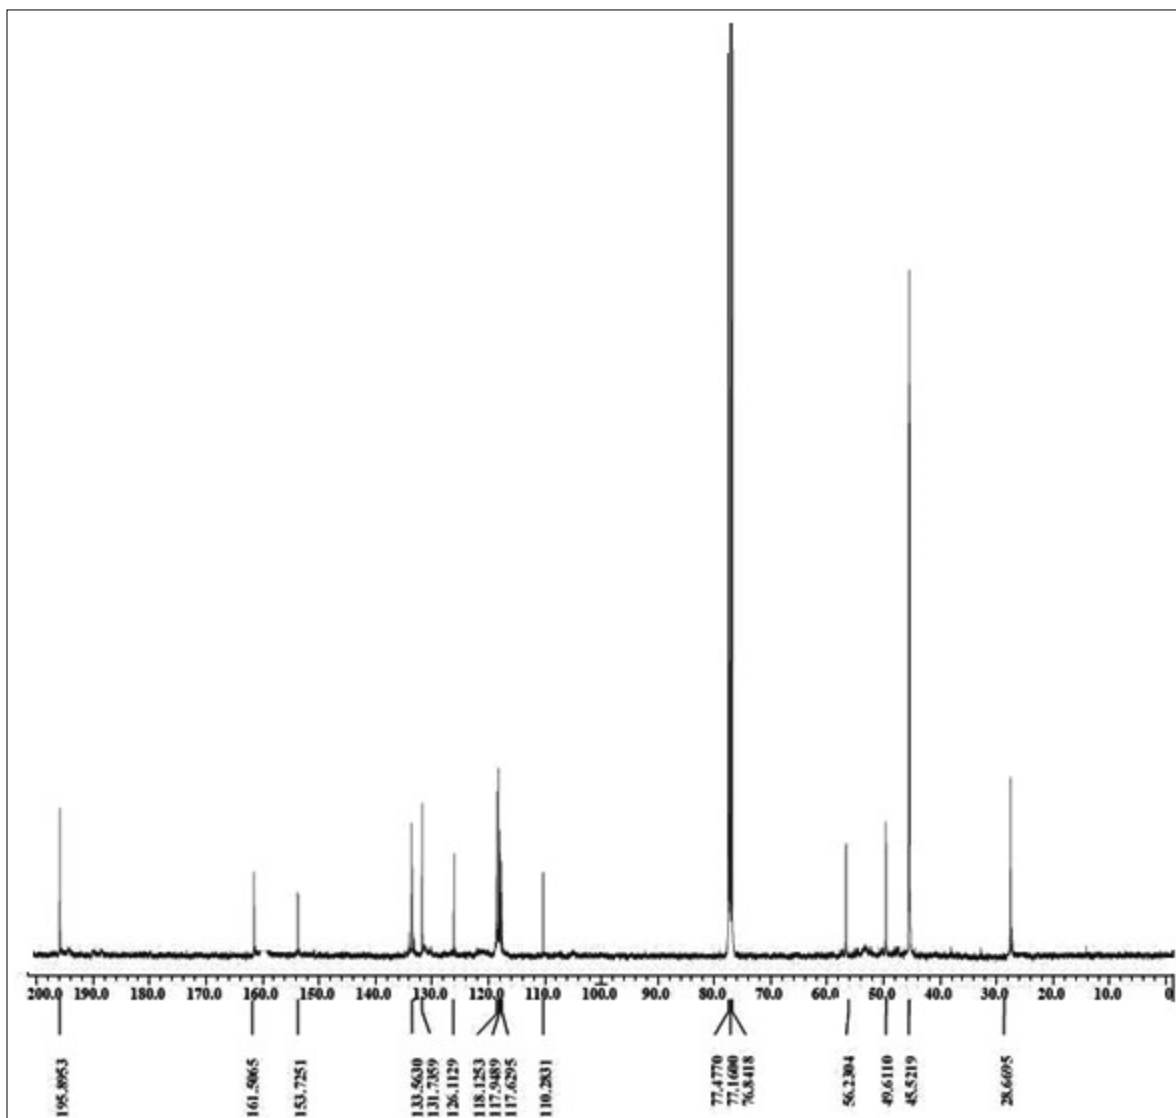

**Figure S2:**  $^{13}\text{C}$  NMR of Compound 2.

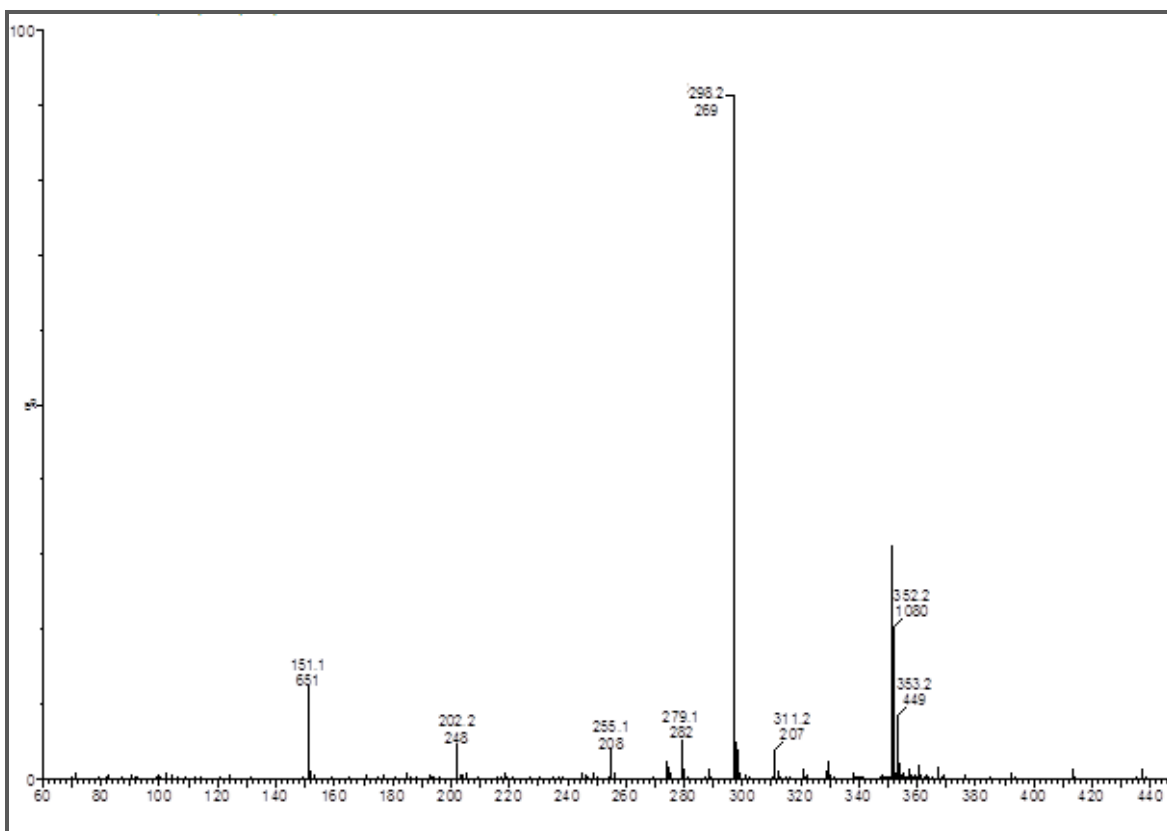

**Figure S3: Mass Spectra of Compound 2.**

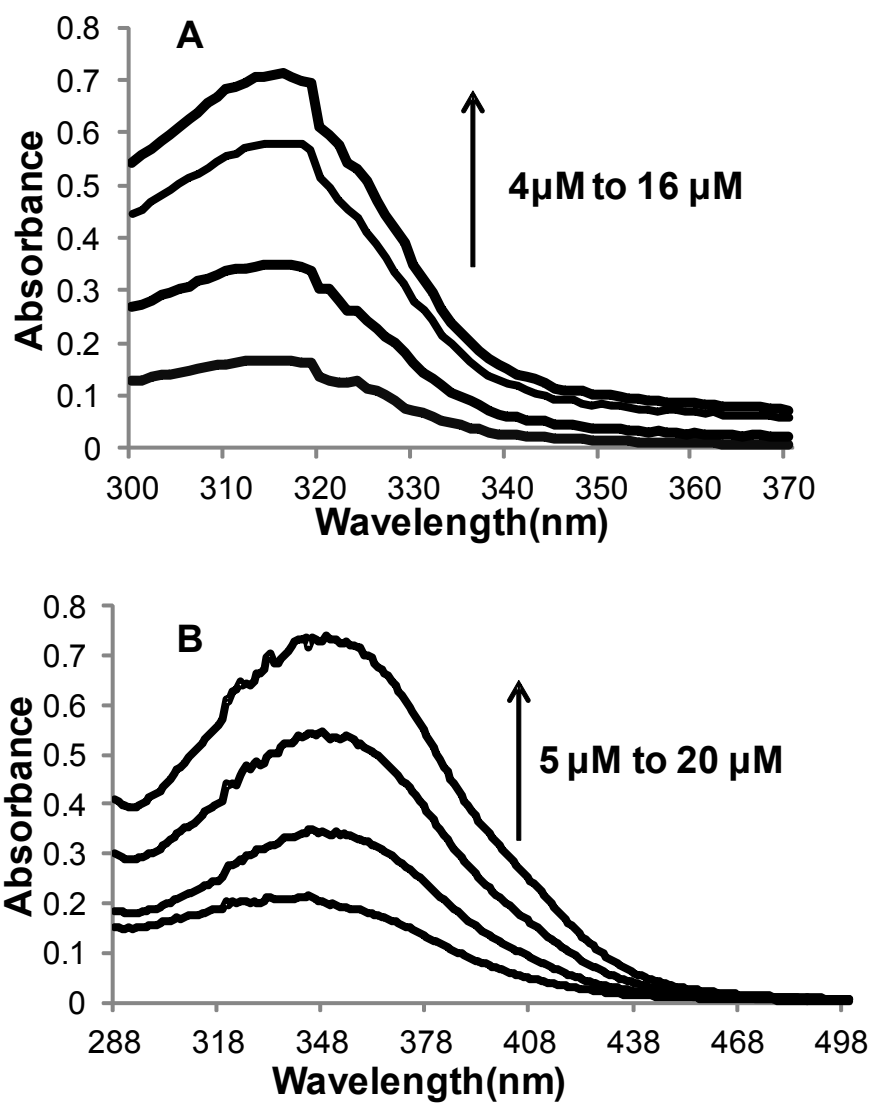

**Figure S4:** (A) Changes in the UV-Vis absorption profile of nano-aggregates of **1** at different concentrations (4 to 16  $\mu\text{M}$ ); (B) Changes in the UV-Vis abs profile of nano-aggregates of **2** at different concentrations (5 to 20  $\mu\text{M}$ ).

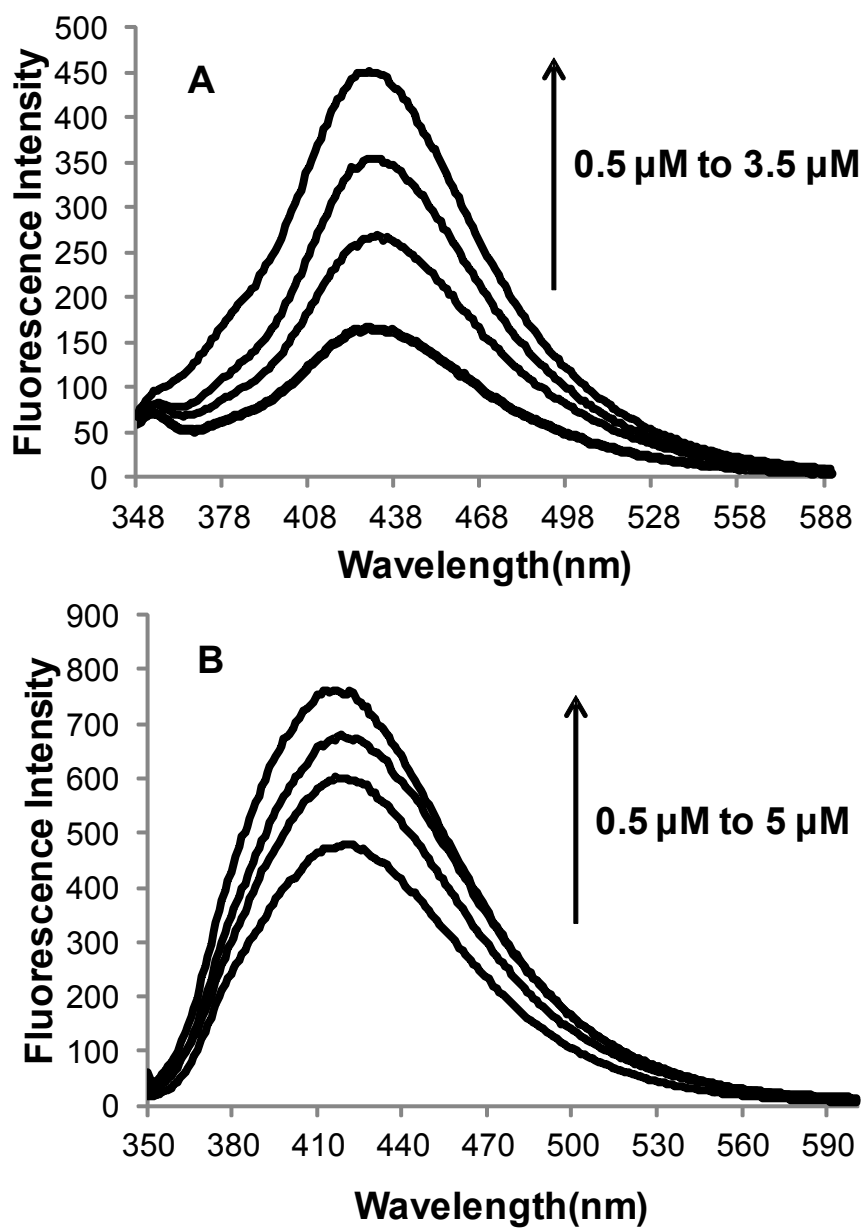

**Figure S5:** (A) Changes in the emission profile of nano-aggregates of **1** at different concentrations (0.5 to 3.5  $\mu\text{M}$ ); (B) Changes in the emission profile of nano-aggregates of **2** at different concentrations (0.5 to 5  $\mu\text{M}$ ).

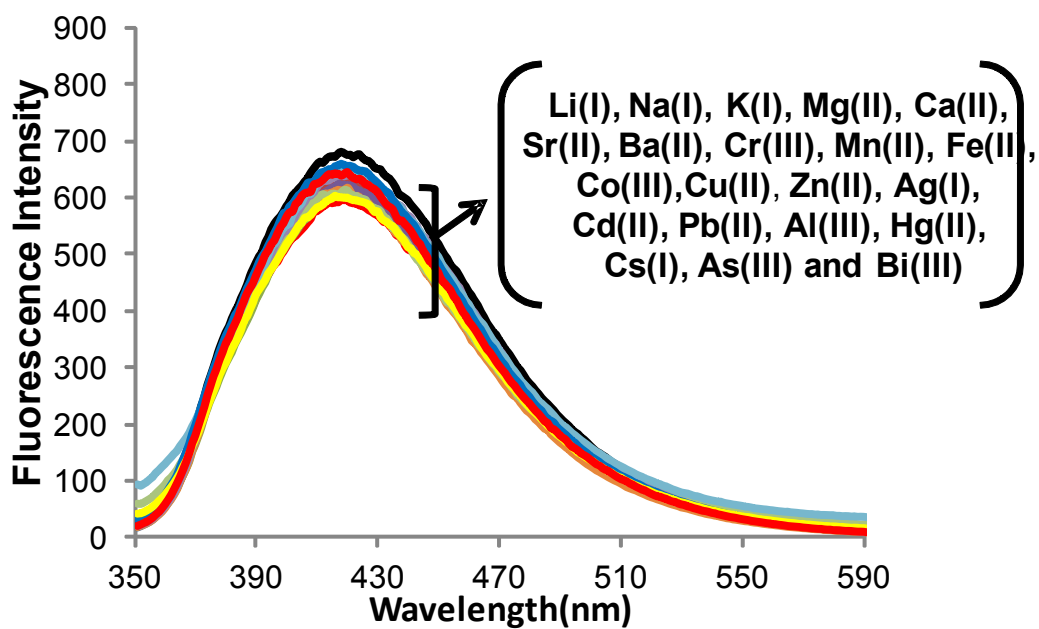

**Figure S6.** Changes in fluorescence intensity of receptor 2 (2.5 μM) upon addition of a various metal salts (5eq.) in aqueous medium (λ<sub>ex</sub> = 345 nm).

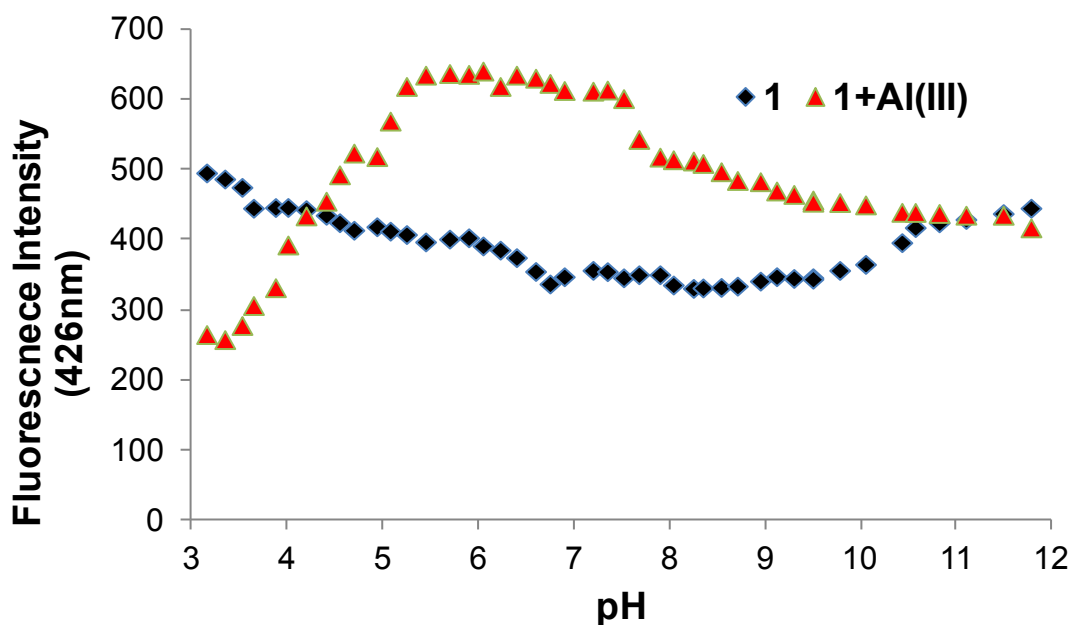

**Figure S7:** Effect of pH on the Fluorescence intensity of a receptor 1 and 1.Al<sup>3+</sup>

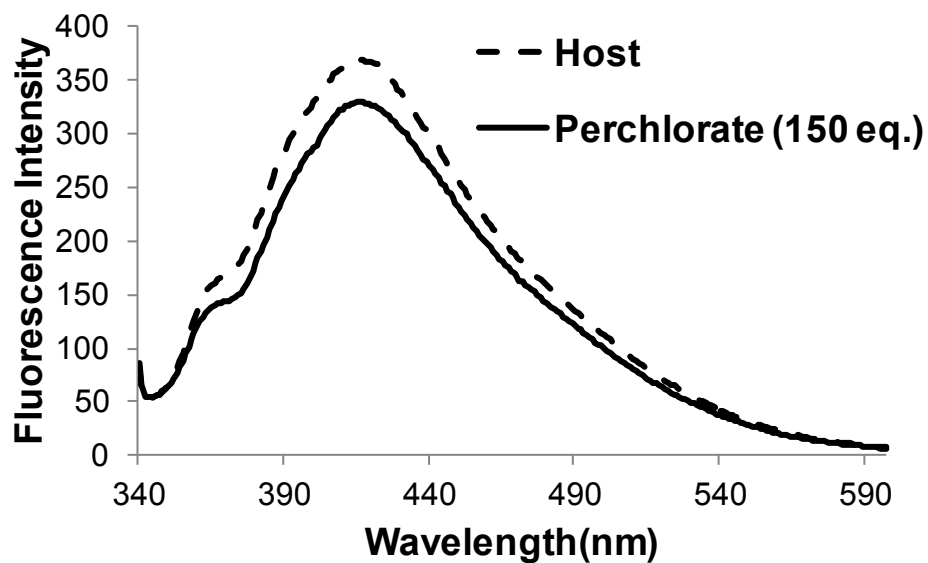

**Figure S8.** Effect of ionic strength on Fluorescence intensity of receptor **1** at  $\lambda_{\text{ex}} = 321$  nm with the addition of 150 eq. of Tetrabutyl ammonium perchlorate.

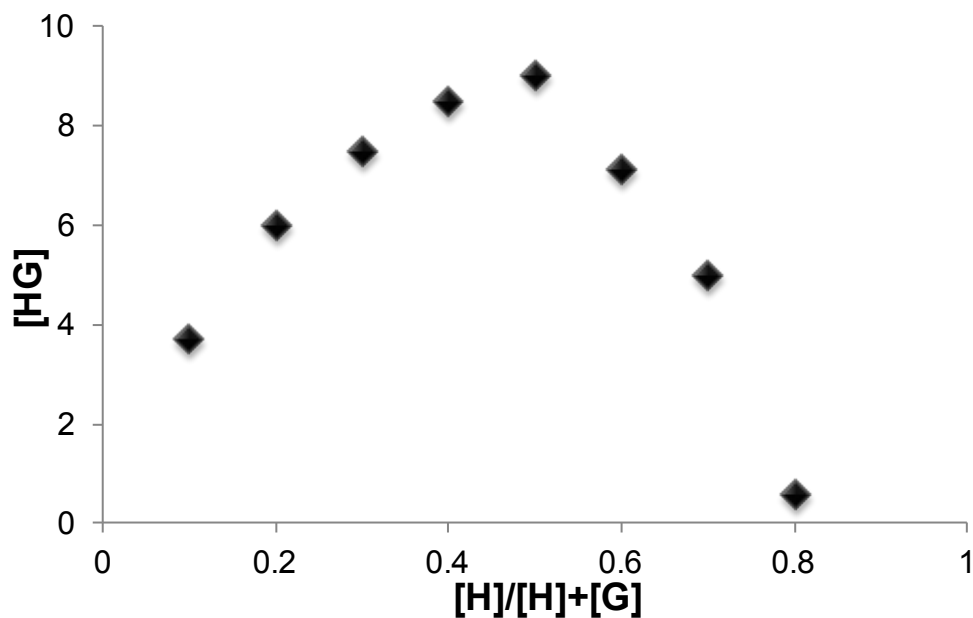

**Figure S9.** Job's plot between sensor **1** and  $\text{Al}^{3+}$ . The concentration of  $[\text{HG}]$  was calculated by the equation  $[\text{HG}] = \Delta I/I_0 \times [\text{H}]$ .
